# Supplementary material
Source: PubMed Central journal article supplement (PMC6892371)
Supplement: 41591_2019_441_MOESM1_ESM.pdf [file 41591_2019_441_MOESM1_ESM.pdf]

In the format provided by the authors and unedited.

# IFN- $\gamma$ -independent immune markers of *Mycobacterium tuberculosis* exposure

Lenette L. Lu<sup>1,2</sup>, Malisa T. Smith<sup>3</sup>, Krystle K. Q. Yu<sup>3</sup>, Corinne Luedemann<sup>2</sup>, Todd J. Suscovich<sup>1,2</sup>, Patricia S. Grace<sup>2</sup>, Adam Cain<sup>2</sup>, Wen Han Yu<sup>1,2,4</sup>, Tanya R. McKittrick<sup>5</sup>, Douglas Lauffenburger<sup>4</sup>, Richard D. Cummings<sup>5</sup>, Harriet Mayanja-Kizza<sup>6</sup>, Thomas R. Hawn<sup>3</sup>, W. Henry Boom<sup>7</sup>, Catherine M. Stein<sup>7,8</sup>, Sarah M. Fortune<sup>1,2</sup>, Chetan Seshadri<sup>3,9\*</sup> and Galit Alter<sup>1,2,9\*</sup>

<sup>1</sup>Department of Immunology and Infectious Diseases, Harvard TH Chan School of Public Health, Boston, MA, USA. <sup>2</sup>Ragon Institute of MGH, MIT and Harvard, Cambridge, MA, USA. <sup>3</sup>Department of Medicine, University of Washington, Seattle, WA, USA. <sup>4</sup>Department of Biological Engineering, MIT, Cambridge, MA, USA. <sup>5</sup>Department of Surgery, Beth Israel Deaconess Medical Center, Harvard Medical School, Boston, MA, USA. <sup>6</sup>Department of Medicine, Makerere University, Kampala, Uganda. <sup>7</sup>Department of Medicine, Case Western Reserve University and Univ. Hospitals Cleveland Medical Center, Cleveland, OH, USA. <sup>8</sup>Department of Population & Quantitative Health Sciences, Case Western Reserve University, Cleveland, OH, USA. <sup>9</sup>These authors contributed equally: Chetan Seshadri, Galit Alter. \*e-mail: [seshadri@u.washington.edu](mailto:seshadri@u.washington.edu); [galter@mgh.harvard.edu](mailto:galter@mgh.harvard.edu)

Supplementary Table 1: Demographic characteristics of study group.

Risk score is determined as previously described<sup>16</sup>. Means and medians are presented as indicated. Categorical variables were compared using a chi-square test, and continuous variables were compared using a Mann-Whitney test; p-values indicate significance according to these statistics. BCG scar indicates prior vaccination with Bacillus Calmette–Guérin (BCG).

|                                                    | <b>“resister”<br/>TST-/IGRA-</b> | <b>LTBI<br/>TST+/IGRA+</b> | <b>p-value</b> |
|----------------------------------------------------|----------------------------------|----------------------------|----------------|
| <b>Current age (median)</b>                        | 20.00                            | 22.50                      | 0.371          |
| <b>Age at recruitment (median)</b>                 | 13                               | 13.5                       | 0.502          |
| <b>Sex (% Female)</b>                              | 42.9%                            | 43.5%                      | 0.951          |
| <b>% with BCG scar</b>                             | 61.2%                            | 65.2%                      | 0.830          |
| <b>Pediatric risk score (mean)</b>                 | 6.07                             | 6.35                       | 0.113          |
| <b>Adult risk score (mean)</b>                     | 6.26                             | 6.70                       | 0.296          |
| <b>Duration of follow-up in years<br/>(median)</b> | 9.31                             | 8.47                       | 0.780          |
| <b>BMI (median)</b>                                | 20.92                            | 21.83                      | 0.388          |

Supplementary Table 2: Demographics of subjects included in this study compared to those from the larger “resister” cohort.

Risk score is determined as previously described<sup>16</sup>. Means and medians are presented as indicated. Categorical variables were compared using a chi-square test, and continuous variables were compared using a Mann-Whitney test; p-values indicate significance according to these statistics. BCG scar indicates Bacillus Calmette–Guérin prior vaccination.

|                                                | <b>Subjects in this study</b> | <b>Subjects not<br/>included in this<br/>study</b> | <b>p-value</b> |
|------------------------------------------------|-------------------------------|----------------------------------------------------|----------------|
| <b>Current age (median)</b>                    | 21.00                         | 22.00                                              | 0.762          |
| <b>Sex (% Female)</b>                          | 43.2%                         | 50.8%                                              | 0.226          |
| <b>% with BCG scar</b>                         | 63.2%                         | 69.1%                                              | 0.972          |
| <b>Pediatric risk score (mean)</b>             | 6.20                          | 6.15                                               | 0.998          |
| <b>Adult risk score (mean)</b>                 | 6.49                          | 6.45                                               | 0.718          |
| <b>Duration of follow-up in years (median)</b> | 9.16                          | 9.99                                               | 0.024          |

Supplementary Table 3: Incidence of new TB cases

Person-years of follow-up were calculated based on last visit and subsequent follow-up dates. Number of new TB cases are shown along with the calculated incidence rate and 95% confidence intervals (CI).

|                                  | <b>PTST-<br/>TST-/IGRA-</b> | <b>LTBI<br/>TST+/IGRA+</b> |
|----------------------------------|-----------------------------|----------------------------|
| <b>Total cases</b>               | 144                         | 303                        |
| <b>Person-years of follow-up</b> | 1020                        | 2212                       |
| <b>Cases of active TB</b>        | 2                           | 4                          |
| <b>Incidence rate [95% CI]</b>   | 0.00196 [0-0.0047]          | 0.00180 [0.000036-0.00357] |

Supplementary Table 4: Multi-parameter flow cytometry panel. The results reported in Figures 3 and 4 of this manuscript utilized an 11-color flow cytometry panel to analyze T cells following in vitro stimulation. Details regarding the antibodies used for these experiments are provided here.

| <b>Specificity</b>             | <b>Fluorophore</b> | <b>Clone</b> | <b>Catalog<br/>Number</b> | <b>Lot<br/>Number</b> | <b>Supplier</b>   |
|--------------------------------|--------------------|--------------|---------------------------|-----------------------|-------------------|
| <b>TNF</b>                     | FITC               | MAb11        | 554512                    | 6245784               | BD Biosciences    |
| <b>CD8a</b>                    | PerCP Cy5.5        | SK1          | 341051                    | 6012504               | BD Biosciences    |
| <b>IL-2</b>                    | PE                 | MQ1-17H12    | 559334                    | 3263570               | BD Biosciences    |
| <b>CD3</b>                     | ECD                | UCHT1        | IM2705U                   | 100                   | Beckman Coulter   |
| <b>CD40L</b>                   | PE Cy5             | TRAP1        | 555701                    | 6119902               | BD Biosciences    |
| <b>CD107a</b>                  | PE Cy7             | H4A3         | 561348                    | 6084604               | BD Biosciences    |
| <b>IL-4</b>                    | APC                | MP4-25D2     | 554486                    | 5234935               | BD Biosciences    |
| <b>IL-17a</b>                  | Ax700              | BL168        | 512318                    | B218394               | BioLegend         |
| <b>CD4</b>                     | APC Ax750          | 13B8.2       | A94685                    | 36                    | Beckman Coulter   |
| <b>IFN-<math>\gamma</math></b> | V450               | B27          | 560371                    | 6105971               | BD Biosciences    |
| <b>Dead Cell Stain</b>         | AmCyan             |              | L34957                    | 1878891               | Life Technologies |
