# Supplementary material
Source: PubMed Central journal article supplement (PMC6892371)
Supplement: 41591_2019_441_MOESM2_ESM.pdf [file 41591_2019_441_MOESM2_ESM.pdf]

## Reporting Summary

Nature Research wishes to improve the reproducibility of the work that we publish. This form provides structure for consistency and transparency in reporting. For further information on Nature Research policies, see [Authors & Referees](#) and the [Editorial Policy Checklist](#).

### Statistical parameters

When statistical analyses are reported, confirm that the following items are present in the relevant location (e.g. figure legend, table legend, main text, or Methods section).

n/a Confirmed

- The exact sample size ( $n$ ) for each experimental group/condition, given as a discrete number and unit of measurement
- An indication of whether measurements were taken from distinct samples or whether the same sample was measured repeatedly
- The statistical test(s) used AND whether they are one- or two-sided  
*Only common tests should be described solely by name; describe more complex techniques in the Methods section.*
- A description of all covariates tested
- A description of any assumptions or corrections, such as tests of normality and adjustment for multiple comparisons
- A full description of the statistics including central tendency (e.g. means) or other basic estimates (e.g. regression coefficient) AND variation (e.g. standard deviation) or associated estimates of uncertainty (e.g. confidence intervals)
- For null hypothesis testing, the test statistic (e.g.  $F$ ,  $t$ ,  $r$ ) with confidence intervals, effect sizes, degrees of freedom and  $P$  value noted  
*Give  $P$  values as exact values whenever suitable.*
- For Bayesian analysis, information on the choice of priors and Markov chain Monte Carlo settings
- For hierarchical and complex designs, identification of the appropriate level for tests and full reporting of outcomes
- Estimates of effect sizes (e.g. Cohen's  $d$ , Pearson's  $r$ ), indicating how they were calculated
- Clearly defined error bars  
*State explicitly what error bars represent (e.g.  $SD$ ,  $SE$ ,  $CI$ )*

*Our web collection on [statistics for biologists](#) may be useful.*

### Software and code

Policy information about [availability of computer code](#)

Data collection

Flow cytometry data was analyzed using FlowJo 10.

Data analysis

Prism 8.0.2 and Matlab R2018b with customized code were used for antibody data analysis. CellProfiler 3.1.8 was used for image analysis. Glycan data was analyzed using GeneMapper 5.0 or GlycanAssure™ Data Acquisition Software 1.0 as noted. From PBMC, cells were enumerated using the Guava easyCyte with guavaSoft 2.6 software. T cell data was processed using using the OpenCyto framework in the R programming environment. To analyze which T-cell subsets were being activated by the various stimulations, COMbinatorial Polyfunctionality Analysis of Antigen-Specific T cell Subsets (COMPASS) was used as detailed in the manuscript and also previously described (Lin et al 2015). Code to complete COMPASS analyses can be found at <https://github.com/seshadrilab/ResisterCOMPASSAnalysis>. Details regarding data analysis for glycan arrays are found at <https://www.functionalglycomics.org>.

For manuscripts utilizing custom algorithms or software that are central to the research but not yet described in published literature, software must be made available to editors/reviewers upon request. We strongly encourage code deposition in a community repository (e.g. GitHub). See the Nature Research [guidelines for submitting code & software](#) for further information.

## Data

Policy information about [availability of data](#)

All manuscripts must include a [data availability statement](#). This statement should provide the following information, where applicable:

- Accession codes, unique identifiers, or web links for publicly available datasets
- A list of figures that have associated raw data
- A description of any restrictions on data availability

The data that support the findings of this study are available from the corresponding author upon reasonable request. All antibody data used is available in the accompanying Supplemental Table. All T cell the flow cytometry data are available for download from ImmPort ([www.immport.org/TBD](http://www.immport.org/TBD)). Code to complete COMPASS analyses can be found at <https://github.com/seshadri/ResisterCOMPASSAnalysis>."

## Field-specific reporting

Please select the best fit for your research. If you are not sure, read the appropriate sections before making your selection.

- Life sciences       Behavioural & social sciences       Ecological, evolutionary & environmental sciences

For a reference copy of the document with all sections, see [nature.com/authors/policies/ReportingSummary-flat.pdf](https://nature.com/authors/policies/ReportingSummary-flat.pdf)

## Life sciences study design

All studies must disclose on these points even when the disclosure is negative.

|                 |                                                                                                                                                                                                                                                                                                                                                                                                                                                                                                                                                                                                                                                                                                                     |
|-----------------|---------------------------------------------------------------------------------------------------------------------------------------------------------------------------------------------------------------------------------------------------------------------------------------------------------------------------------------------------------------------------------------------------------------------------------------------------------------------------------------------------------------------------------------------------------------------------------------------------------------------------------------------------------------------------------------------------------------------|
| Sample size     | Sample size for antibody studies were based on prior published studies of individuals with latent and active TB (Lu et al 2016). Sample size for T cell studies were motivated by balancing for confounders as well as recently published study of South African adolescents (Seshadri et al 2015).                                                                                                                                                                                                                                                                                                                                                                                                                 |
| Data exclusions | Pre established criteria led to the exclusion of one individual from the LTBI group due to clinical classification. For T cell studies samples with poor viability defined on pre established criteria of low CD3 counts (<10,000 cells) or low CD4 counts (<3,000 cells) were excluded from further analysis.                                                                                                                                                                                                                                                                                                                                                                                                      |
| Replication     | Luminex data was gathered twice in technical duplicate across three different plasma dilutions. Fc effector functional assays were performed in technical duplicate across three different plasma dilutions. For antibody Fc functional assays involving primary immune cells, four different donors were used. For primary macrophage assays involving Mycobacterium tuberculosis, three different donors were used and each condition was performed in triplicate over three dilutions. Five additional macrophage donors were used at one dilution given limitations of sample availability. Replicates in all assays were confirmatory and the extent described within the text and shown in the main figures,. |
| Randomization   | Individuals were allocated into experimental groups by clinical criteria as described in the manuscript with matching based on age, gender, and epidemiological risk factors.                                                                                                                                                                                                                                                                                                                                                                                                                                                                                                                                       |
| Blinding        | Luminex, Fc effector functions, IgG glycosylation data was gathered blinded. Analysis was performed after collection of aforementioned data and unblinding.                                                                                                                                                                                                                                                                                                                                                                                                                                                                                                                                                         |

## Reporting for specific materials, systems and methods

### Materials & experimental systems

- | n/a                                 | Involved in the study                                           |
|-------------------------------------|-----------------------------------------------------------------|
| <input type="checkbox"/>            | <input checked="" type="checkbox"/> Unique biological materials |
| <input type="checkbox"/>            | <input checked="" type="checkbox"/> Antibodies                  |
| <input type="checkbox"/>            | <input checked="" type="checkbox"/> Eukaryotic cell lines       |
| <input checked="" type="checkbox"/> | <input type="checkbox"/> Palaeontology                          |
| <input checked="" type="checkbox"/> | <input type="checkbox"/> Animals and other organisms            |
| <input type="checkbox"/>            | <input checked="" type="checkbox"/> Human research participants |

### Methods

- | n/a                                 | Involved in the study                              |
|-------------------------------------|----------------------------------------------------|
| <input checked="" type="checkbox"/> | <input type="checkbox"/> ChIP-seq                  |
| <input type="checkbox"/>            | <input checked="" type="checkbox"/> Flow cytometry |
| <input checked="" type="checkbox"/> | <input type="checkbox"/> MRI-based neuroimaging    |

## Unique biological materials

Policy information about [availability of materials](#)

Obtaining unique materials All reagents are commercially available other than the patient plasma and cell samples.

## Antibodies

Antibodies used

Commercial antibodies used in this study are described in materials and methods with supplier name and catalog number and are listed below. The generation of non commercial antibody samples is described in the materials and methods.

| Specificity     | Fluorophore     | Clone      | Catalog #   | Lot #       | Supplier               |
|-----------------|-----------------|------------|-------------|-------------|------------------------|
| TNF             | FITC            | MAb11      | 554512      | 6245784     | BD Biosciences         |
| CD8a            | PerCP Cy5.5     | SK1        | 341051      | 6012504     | BD Biosciences         |
| IL-2            | PE              | MQ1-17H12  | 559334      | 3263570     | BD Biosciences         |
| CD3             | ECD             | UCHT1      | IM2705U     | 100         | Beckman Coulter        |
| CD40L           | PE Cy5          | TRAP1      | 555701      | 6119902     | BD Biosciences         |
| CD107a          | PE Cy7          | H4A3       | 561348      | 6084604     | BD Biosciences         |
| IL-4            | APC             | MP4-25D2   | 554486      | 5234935     | BD Biosciences         |
| IL-17a          | Ax700           | BL168      | 512318      | B218394     | BioLegend              |
| CD4             | APC Ax750       | 13B8.2     | A94685      | 36          | Beckman Coulter        |
| IFN-γ           | V450            | B27        | 560371      | 6105971     | BD Biosciences         |
| Dead Cell Stain | AmCyan          |            | L34957      | 1878891     | Life Technologies      |
| CD107a          | PE-Cy5          | H4A3       | 555802      | 396136      | BD Biosciences         |
| CD16            | APC-Cy7         | 3G8        | 557758      | 396864      | BD Biosciences         |
| CD56            | PE-Cy7          | B159       | 557747      | 396853      | BD Biosciences         |
| CD3             | Alexa Fluor 700 | UCHT1      | 557943      | 396952      | BD Biosciences         |
| IFN-γ           | APC             | B27        | 554702      | 398580      | BD Biosciences         |
| MIP-1b          | PE              | D21-1351   | 550078      | 393549      | BD Biosciences         |
| CD66b           | Pacific Blue    | G10F5      | 305112      | 2563294     | Biolegend              |
| IgG4 Fc         | PE              | HP6025     | 9200-09     | B5313-SP55B | SouthernBiotech        |
| IgG3 Hinge      | PE              | HP6050     | 9210-09     | F1818-Y198  | SouthernBiotech        |
| IgG2 Fc         | PE              | HP6002     | 9070-09     | B3016-T066Y | SouthernBiotech        |
| IgG1 Hinge      | PE              | 4E3        | 9052-09     | G4015-Z678  | SouthernBiotech        |
| IgG Fc          | PE              | JDC-10     | 9040-09     | A1918-Z368  | SouthernBiotech        |
| IgM             | PE              | SA-DA4     | 9020-09     | C2718-T798B | SouthernBiotech        |
| IgA1            | PE              | B3506B4    | 9130-09     | C3818-S378C | SouthernBiotech        |
| IgA2            | PE              | A9604D2    | 9140-09     | J2113-S498B | SouthernBiotech        |
| IgG Fc          | Alexa Fluor 488 | polyclonal | 109-545-008 | 126214      | Jackson ImmunoResearch |
| IgM Fc5μ        | Alexa Fluor 647 | polyclonal | 109-605-043 | 128711      | Jackson ImmunoResearch |

Validation

References are included for manuscripts by the authors that have validated all reagents used for the analysis described in this manuscript. More specifically, for antibody dependent neutrophil phagocytosis, validation of CD66b antibody is described in 1) Lu et al 2016 Cell PMID 27667685, 2) Worley et al 2018 Journal of Immunological Methods PMID 29605231, 3) Sapphire et al 2018, Cell PMID 30096313, 4) Gunn et al 2018 Cell Host and Microbe PMID 30092199 5) Gilchuk et al 2018 Immunity PMID 30029854, 6) Bornholdt et al 2019 Cell Host and Microbe PMID 30629918. Validation of antibodies for antibody dependent NK cell activation have been described in 1) Jegaskanda et al 2013 J Virology PMID 23468501, 2) Chung et al 2014 Sci Transl Med 24648341, 3) Ackerman et al 2016 PMID 26745376, 4) Lu et al 2016 Cell PMID 27667685, 5) Sapphire et al 2018, Cell PMID 30096313, 6) Gunn et al 2018 Cell Host and Microbe PMID 30092199 7) Gilchuk et al 2018 Immunity PMID 30029854. The choice of T cell and functional markers was determined by those included in a formally validated endpoint assay for vaccine studies: Horton et al 2007 J Immunol Methods PMID 17451739 and De Rosa et al 2012 Cytometry A PMID 23081852.

## Eukaryotic cell lines

Policy information about [cell lines](#)

Cell line source(s)

THP1 from ATCC Cat#: TIB202

Authentication

Authentication was performed via STR Profiling service ATCC 135-XV

Mycoplasma contamination

THP1 cell line was tested and negative for mycoplasma via ATCC Univ Mycoplasma kit 30-1012K

Commonly misidentified lines  
(See [ICLAC](#) register)

No commonly misidentified cell lines were used.

## Human research participants

Policy information about [studies involving human research participants](#)

### Population characteristics

Relevant covariate population characteristics of age, gender, TB diagnosis, BCG vaccination, body mass index, and epidemiological risk score are reported in Extended data Tables 1 and 3 and in brief summarized below:

|                             | "resister" (TST-/IGRA- LTBI) vs TST+/IGRA+ | p-value |
|-----------------------------|--------------------------------------------|---------|
| Current age (median)        | 20.00                                      | 0.371   |
| Age at recruitment (median) | 13                                         | 0.502   |
| Sex (% Female)              | 42.9%                                      | 0.951   |
| % with BCG scar             | 61.2%                                      | 0.830   |
| Pediatric risk score (mean) | 6.07                                       | 0.113   |
| Adult risk score (mean)     | 6.26                                       | 0.296   |
| BMI (median)                | 20.92                                      | 0.388   |

In addition, these characteristics are included in an Excel sheet provided as supplementary information. For control healthy HIV negative individuals from North America, no demographic characteristics were used for selection. Rather, selection was based on no clinical signs of illness and diagnostic testing negative for active HIV, HCV, and HBV infections.

### Recruitment

Participants were recruited from the Kawempe Community Health study described in detail in Stein et al 2018 and Chheng et al 2015. In brief, adults with pulmonary TB were recruited from clinics at the Uganda National TB and Leprosy Program treatment center at Mulago Hospital, referred to the TB research clinic at Mulago Hospital, or recruited through community sensitization efforts in the Kawempe division of Kampala. As such, selection bias is primarily driven by referral to clinical care for which an effort was made to recruit through community sensitization. Household contacts were recruited and evaluated for TB by clinical signs and symptoms, radiology, microbiology by trained clinicians. Latent TB and "resister" phenotypes were identified by repeated testing of TST over two years of followup. To specifically determine long term outcomes of these individuals, contacts who remained persistently TST negative and contacts with traditional LTBI with equivalent baseline clinical and epidemiological risk scores were re-traced in 2014-2017 at an average of 9.5 years after initial Mtb exposure. Three sequential IGRAs and one additional TST was performed at the end of the retracing study to robustly classify LTBI and "resister" phenotypes.

## Flow Cytometry

### Plots

Confirm that:

- The axis labels state the marker and fluorochrome used (e.g. CD4-FITC).
- The axis scales are clearly visible. Include numbers along axes only for bottom left plot of group (a 'group' is an analysis of identical markers).
- All plots are contour plots with outliers or pseudocolor plots.
- A numerical value for number of cells or percentage (with statistics) is provided.

### Methodology

#### Sample preparation

Peripheral blood was obtained in sodium heparin Vacutainer tubes (BD Biosciences). Plasma and PBMC were isolated by Ficoll-Histopaque (Sigma-Aldrich) density centrifugation and stored via liquid nitrogen until further use.

#### Instrument

Acquisition of T cell data was on BD LSRFortessa, antibody Fc effector functional data on BD LSRII, luminex data on BioPlex200, antibody glycosylation data on Applied Biosystems 3500/3500xL Genetic Analyzer, and microscopy data on Operetta High-Content Imaging Fluorescence Microscope.

#### Software

FlowJo 10 was used to collect and analyze flow cytometry data. Cell Profiler 3.1.8 was used to quantitate microscopy images.

#### Cell population abundance

To observe intracellular cytokine staining following antigen stimulation, one million cells/well were plated and stimulated with reported antigens and cocktail as described in materials and methods. A previously published optimized and validated 12 color panel was used to examine cells (De Rosa et al 2012, Horton et al 2007).

#### Gating strategy

Relevant gating strategies are provided in Supplemental Information.

- Tick this box to confirm that a figure exemplifying the gating strategy is provided in the Supplementary Information.
